# Supplementary material for: SMART-LAMP: A Smartphone-Operated Handheld Device for Real-Time Colorimetric Point-of-Care Diagnosis of Infectious Diseases via Loop-Mediated Isothermal Amplification
Source: MDPI journal article supplement (doi:10.3390/bios12060424), 2022-06-16
Supplement: s1 [file s1]

## **SUPPLEMENTARY MATERIAL**

### **SMART-LAMP: A smartphone-operated handheld device for real-time colorimetric point-of-care diagnosis of infectious diseases via loop-mediated isothermal amplification**

Juan García-Bernalt Diego<sup>1</sup>, Pedro Fernández-Soto<sup>1\*</sup>, Sergio Márquez Sánchez<sup>2,3</sup>, Daniel Santos Santos<sup>2</sup>, Begoña Febrer-Sendra, Beatriz Crego-Vicente, Juan Luis Muñoz-Bellido<sup>4</sup>, Moncef Belhassen-García<sup>5</sup>, Juan M. Corchado Rodríguez<sup>2,3</sup> and Antonio Muro<sup>1</sup>.

<sup>1</sup>Infectious and Tropical Diseases Research Group (e-INTRO), Biomedical Research Institute of Salamanca-Research Centre for Tropical Diseases at the University of Salamanca (IBSAL-CIETUS), Faculty of Pharmacy, University of Salamanca, 37007 Salamanca, Spain.

<sup>2</sup> BISITE Research Group, University of Salamanca. Calle Espejo s/n. Edificio Multiusos I+D+i, 37007, Salamanca, Spain.

<sup>3</sup>Air Institute, IoT Digital Innovation Hub (Spain), 37188 Salamanca, Spain.

<sup>4</sup>Microbiology and Parasitology Service, Complejo Asistencial Universitario de Salamanca, University of Salamanca, 37007 Salamanca, Spain.

<sup>5</sup>Internal Medicine Service, Infectious Diseases Section, Complejo Asistencial Universitario de Salamanca, University of Salamanca, 37007 Salamanca, Spain.

\*Corresponding authors: pfsoto@usal.es (Telephone: +34 677596173 Ext. 6861)/Antonio Muro: ama@usal.es

**CONTENTS**

**Figure S1.** Single-line electronic circuit sketches of the different modules of the SMART-LAMP..... **3**

**Figure S2.** Printed Circuit Board (PCB) of SMART-LAMP..... **4**

**Figure S3.** SMART-LAMP app screen workflow..... **5**

**Figure S4.** Comparison of fresh-LAMP and dry-LAMP results using malachite green and the effect of storage..... **6**

**Table S1.** List of components of SMART-LAMP..... **7**

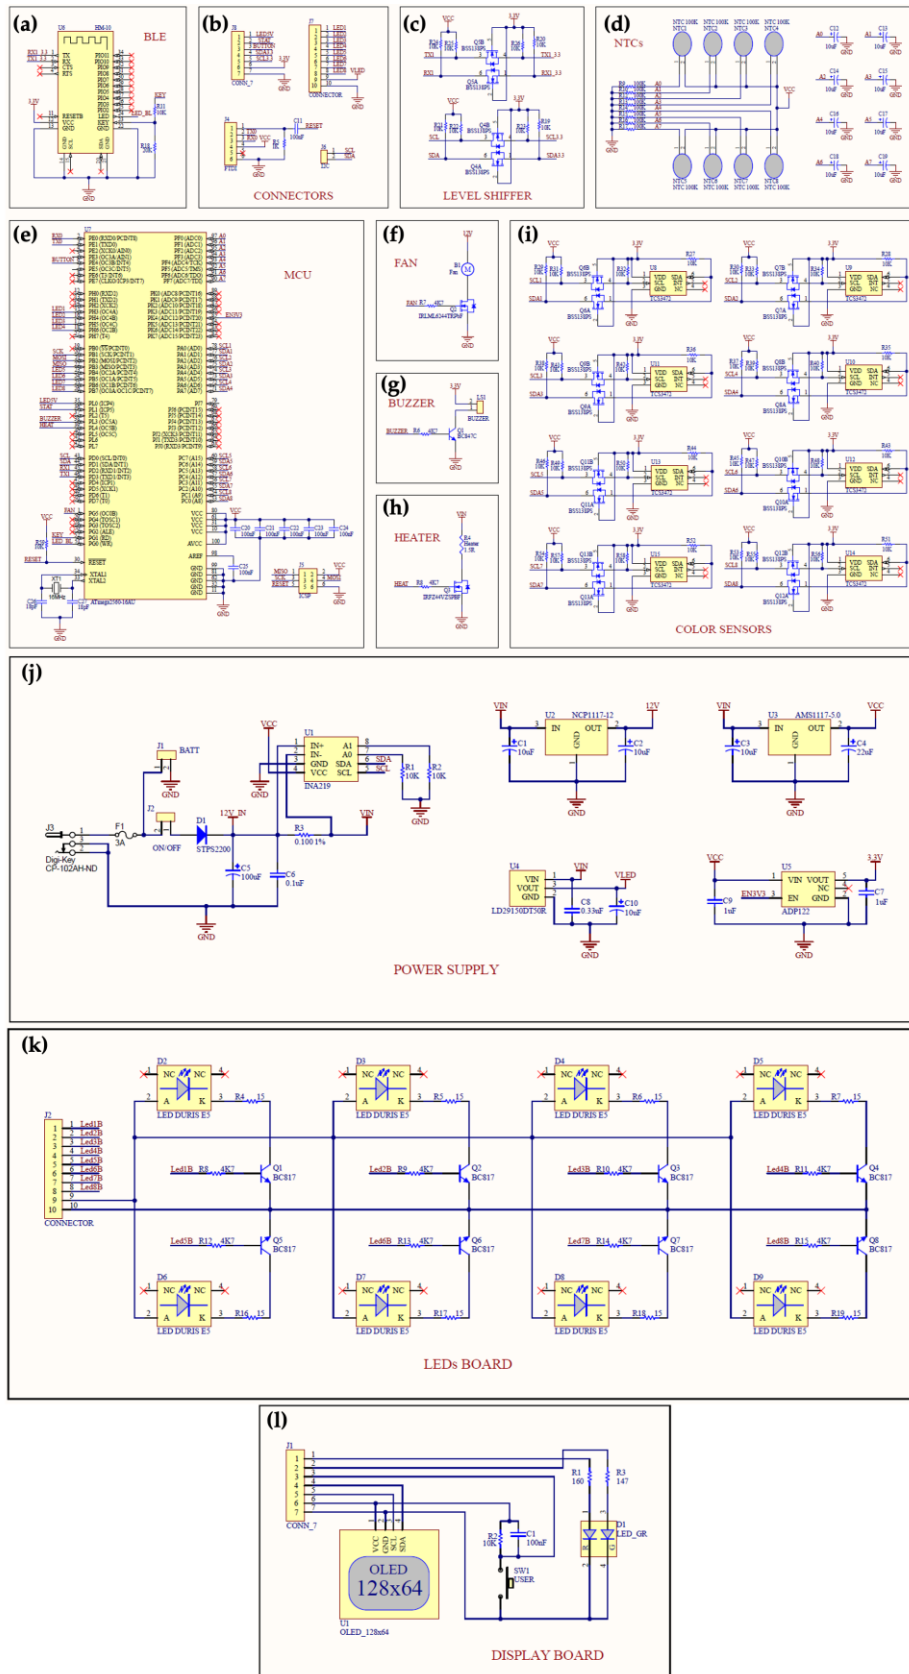

**Figure S1.** Single-line electronic circuit sketches of the different modules of the SMART-LAMP: **(a)** Bluetooth Low Energy Circuit (BLE); **(b)** Connectors; **(c)** Level Shifter; **(d)** NTC Thermistors; **(e)** Microcontroller Unit (MCU); **(f)** Fan; **(g)** Buzzer; **(h)** Heater; **(i)** Color sensors; **(j)** Power supply; **(k)** LEDs Board; **(l)** Display Board.

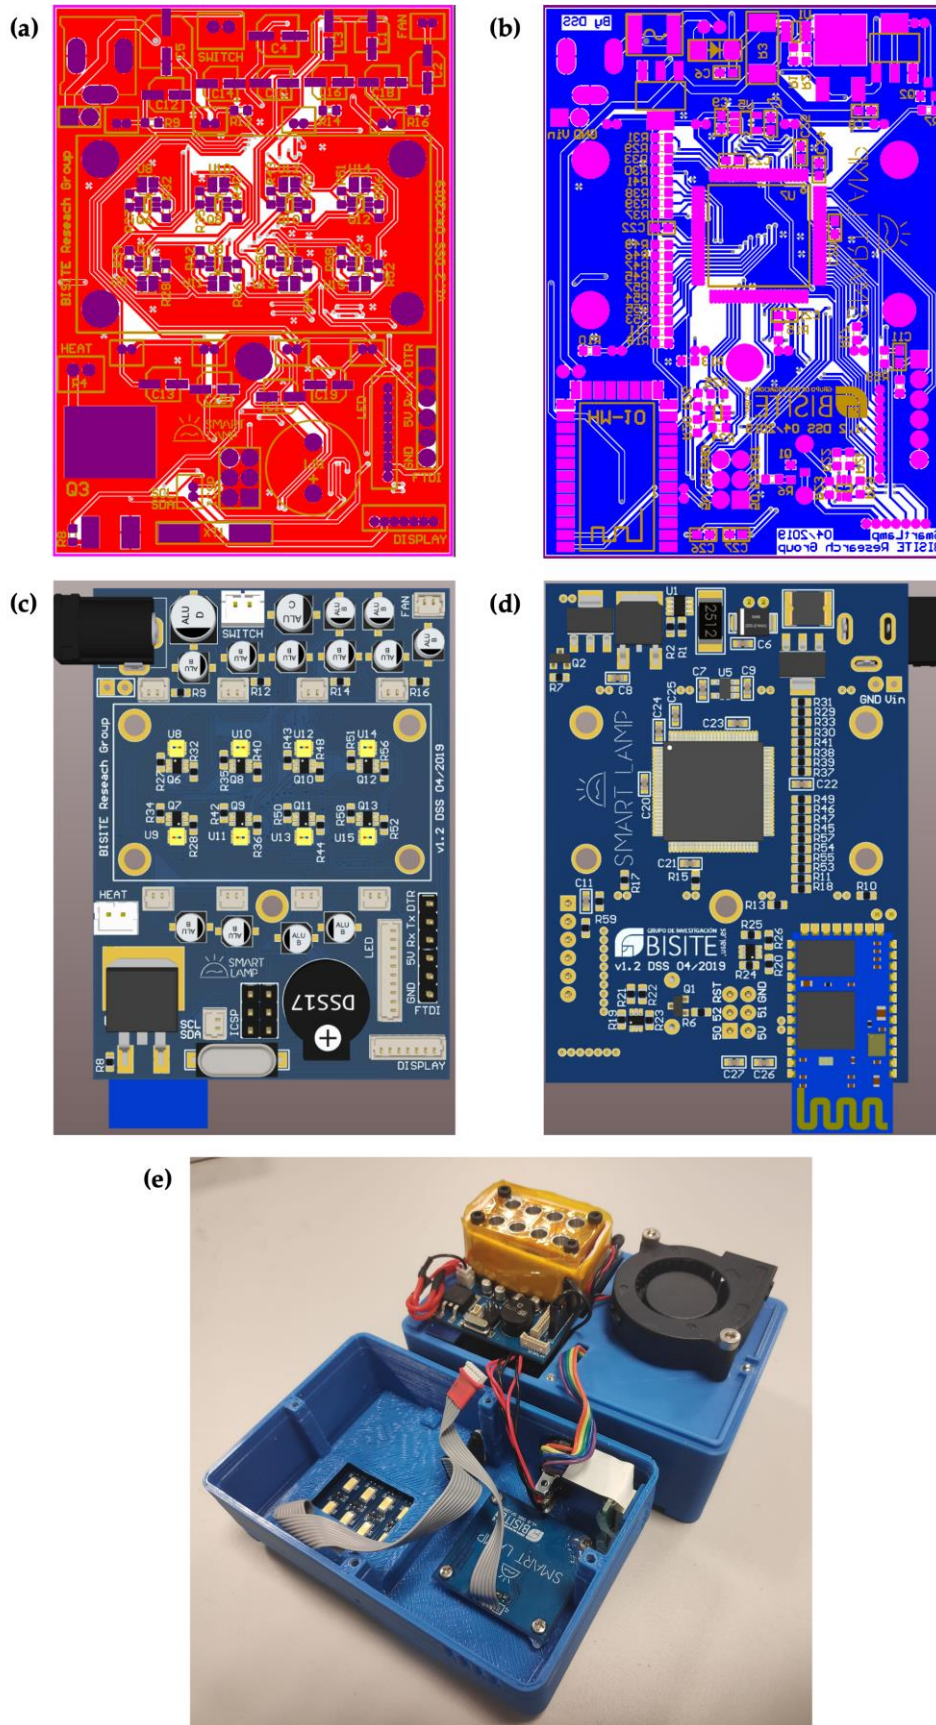

**Figure S2.** Printed Circuit Board (PCB) of SMART-LAMP: (a) Upper face of the PCB; (b) Bottom face of the PCB; (c) 3D render of the upper face of the PCB; (d) 3D render of the bottom face of the PCB; (e) Interior of the SMART-LAMP device.

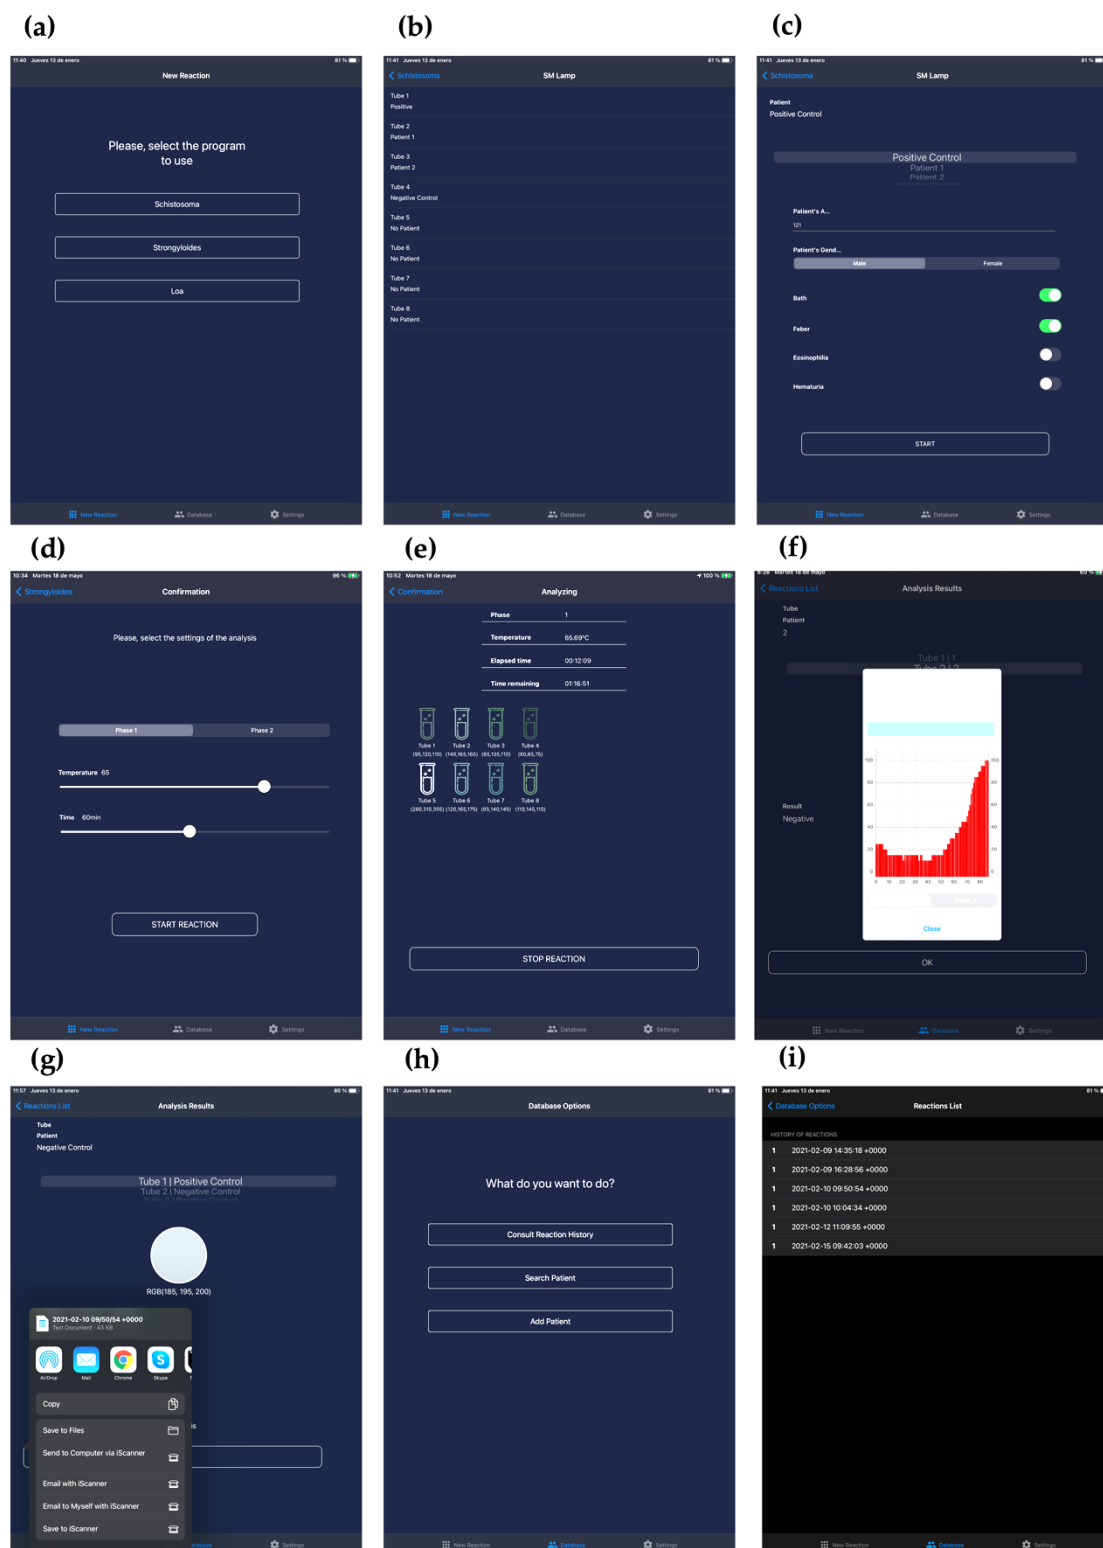

**Figure S3.** SMART-LAMP app screen workflow: **(a)** Initial screen for the selection of the scheduled reaction conditions; **(b)** Selection of the samples to be analyzed and the position of each sample in the device; **(c)** Screen to add relevant information that has been acquired during sample collection; **(d)** Modification of reaction conditions in terms of temperature and time; **(e)** Real-time visualization of the reaction progress; **(f)** Real-time results for one sample, visualized at the end of the reaction; **(g)** .csv file can be exported at the end of the reaction. **(h)** Screen to access patient database and previous reactions; **(i)** Past reactions database.

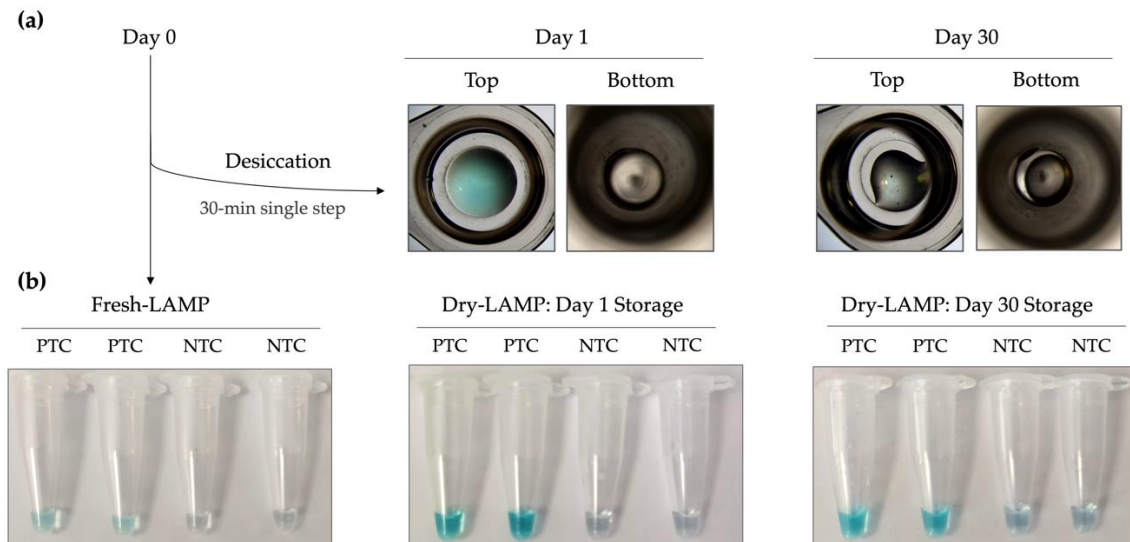

**Figure S4.** Comparison of fresh-LAMP and dry-LAMP results using malachite green and the effect of storage: **(a)** A view under a magnifying glass of the top (left) and bottom (right) partial mix pellets at day 1 and 30 post-desiccation; **(b)** Colorimetric change of 0.008% w/v MG between positive (PTC) and negative (NTC) results for a LAMP assay targeting *Schistosoma haematobium* as example, using fresh-LAMP and dry-LAMP at day 1 and 30 post-desiccation.

**Table S1.** List of components of SMART-LAMP.

| Modules           | Component                                      | Quantity |
|-------------------|------------------------------------------------|----------|
| <b>Main Board</b> | ATmega2560-16AU MCU                            | 1        |
|                   | HM-10 Bluetooth module                         | 1        |
|                   | TCS3472 RGB Sensor                             | 8        |
|                   | NTC Resistor 100K                              | 2        |
|                   | SMD Resistor 100K 0603                         | 2        |
|                   | Electrolytic Capacitor 10uF 16V                | 6        |
|                   | INA219 Sensor                                  | 1        |
|                   | SMD Resistor 0,1 ohms 1% 2512                  | 1        |
|                   | Electrolytic Capacitor 100uF 16V               | 1        |
|                   | Regulator NCP1117-12                           | 1        |
|                   | Regulator AMS1117-5.0                          | 1        |
|                   | Regulator LD29150DT50R                         | 1        |
|                   | Regulator ADP122                               | 1        |
|                   | Mosfet BSS138PS                                | 10       |
|                   | Mosfet IRLML6244TRPbF                          | 1        |
|                   | Mosfet IRFZ44VZ                                | 1        |
|                   | BC847C Transistor                              | 1        |
|                   | SMD Resistor 10K 0603                          | 44       |
|                   | Ceramic Capacitor 100nF 0603                   | 8        |
|                   | Ceramic Capacitor 1uF 0603                     | 2        |
|                   | 16MHz crystal                                  | 1        |
|                   | Ceramic Capacitor 18 pF 0603                   | 2        |
|                   | SMD Resistor 4K7 0603                          | 3        |
|                   | Electrolytic Capacitor 22uF 16V                | 1        |
|                   | Ceramic Capacitor 330nF 0603                   | 1        |
|                   | 3A fuse                                        | 1        |
|                   | STPS2200 diode                                 | 1        |
|                   | PicoBlade PCB Header 10 Circuits               | 1        |
|                   | PicoBlade PCB Header 7 Circuits                | 1        |
|                   | PicoBlade Receptacle Crimp Housing 10 Circuits | 1        |
|                   | PicoBlade Receptacle Crimp Housing 7 Circuits  | 1        |
|                   | PicoBlade Female Crimp Terminal                | 19       |
|                   | Active buzzer                                  | 1        |
|                   | 6x1 male pin header                            | 1        |
|                   | 3x2 male pin header                            | 1        |
|                   | PicoBlade PCB Header 2 Circuits                | 1        |
|                   | JTS-PHX 2-pin connector female                 | 2        |
|                   | JTS-PHX 2-pin connector male                   | 2        |
|                   | 12V Radial Fan                                 | 1        |
|                   | FTDI module                                    | 1        |
|                   | Conector DC Hembra                             | 1        |
|                   | Power Switch                                   | 1        |

|                      |                                                |     |
|----------------------|------------------------------------------------|-----|
| <b>Display Board</b> | OLED Display 128x64 I2C                        | 1   |
|                      | SMD Button                                     | 1   |
|                      | Ceramic Capacitor 100nF 0603                   | 1   |
|                      | SMD Resistor 10K 0603                          | 1   |
|                      | SMD Resistor 147 ohms 0603                     | 1   |
|                      | SMD Resistor 160 ohms 0603                     | 1   |
|                      | Bicolor SMD LED                                | 1   |
|                      | PicoBlade Female Crimp Terminal                | 7   |
|                      | PicoBlade PCB Header 7 Circuits                | 1   |
|                      | PicoBlade Receptacle Crimp Housing 7 Circuits  | 1   |
| <b>LED Board</b>     | LED Duris E5 SMD                               | 8   |
|                      | BC817 Transistor                               | 8   |
|                      | SMD Resistor 4K7 0603                          | 8   |
|                      | SMD Resistor 15 ohms 0603                      | 8   |
|                      | PicoBlade Female Crimp Terminal                | 10  |
|                      | PicoBlade PCB Header 10 Circuits               | 1   |
|                      | PicoBlade Receptacle Crimp Housing 10 Circuits | 1   |
| <b>Heater</b>        | Aluminum block                                 | 1   |
|                      | Polyamide heaters                              | 2   |
|                      | Thermal insulation cm2                         | 36  |
| <b>Case</b>          | PLA gr                                         | 416 |
|                      | Magnets                                        | 6   |
|                      | Screws                                         | 20  |
